# Supplementary material
Source: PubMed Central journal article supplement (PMC10228180)

**Supplemental Table 1.** Summary of statistical analysis of animal survival times.

| Model IC-2305GBM                   | Animal Counts/Status |   |    |    | EFS Evaluation |        |           | P value |                | Toxicity       |                       |
|------------------------------------|----------------------|---|----|----|----------------|--------|-----------|---------|----------------|----------------|-----------------------|
|                                    | Group                | N | Nx | Na | Nev            | KM med | EFS T - C | EFS T/C | exact log-rank | Gehan-Wilcoxon | Max Avg % Weight Loss |
| Control (vehicle)                  | 10                   | 0 | 10 | 10 | 46.0           |        |           |         |                |                | 0.0%                  |
| Tazemetostat 250 mg/kg             | 10                   | 0 | 10 | 10 | 60.5           | 14.5   | 1.32      | < 0.001 | < 0.001        |                | 0.0%                  |
| Tazemetostat 400 mg/kg             | 10                   | 0 | 10 | 10 | 66.5           | 20.5   | 1.45      | < 0.001 | < 0.001        |                | 1.0%                  |
| vs Tazmetostat 250 mg/kg           |                      |   |    |    |                | 6.0    | 1.10      | 0.277   | 0.048          |                |                       |
| XRT                                | 10                   | 0 | 10 | 10 | 73.5           | 27.5   | 1.60      | < 0.001 | 0.005          |                | 1.6%                  |
| vs Tazmetostat 250 mg/kg           |                      |   |    |    |                | 13.0   | 1.21      | 0.012   | 0.035          |                |                       |
| vs Tazmetostat 400 mg/kg           |                      |   |    |    |                | 7.0    | 1.11      | 0.021   | 0.114          |                |                       |
| Tazemetostat 250 mg/kg + XRT       | 10                   | 0 | 10 | 10 | 58.0           | 12.0   | 1.26      | 0.002   | 0.002          |                | 1.4%                  |
| vs Tazmetostat 250 mg/kg           |                      |   |    |    |                | -2.5   | 0.96      | 0.257   | 0.423          |                |                       |
| <b>Model ICb-1078MB</b>            |                      |   |    |    |                |        |           |         |                |                |                       |
| Control (vehicle)                  | 10                   | 2 | 8  | 8  | 49.5           |        |           |         |                |                | 0.4%                  |
| Tazemetostat 250 mg/kg             | 10                   | 0 | 10 | 10 | 68.5           | 19.0   | 1.38      | 0.036   | 0.010          |                | 0.8%                  |
| Tazemetostat 400 mg/kg             | 10                   | 1 | 9  | 9  | 60.0           | 10.5   | 1.21      | 0.427   | 0.282          |                | 7.7%                  |
| vs Tazmetostat 250 mg/kg           |                      |   |    |    |                | -8.5   | 0.88      | 0.341   | 0.065          |                |                       |
| XRT                                | 10                   | 0 | 10 | 10 | 77.0           | 27.5   | 1.56      | 0.009   | 0.002          |                | 1.7%                  |
| vs Tazmetostat 250 mg/kg           |                      |   |    |    |                | 8.5    | 1.12      | 0.151   | 0.184          |                |                       |
| vs Tazmetostat 400 mg/kg           |                      |   |    |    |                | 17.0   | 1.28      | 0.026   | 0.007          |                |                       |
| Cisplatin                          | 10                   | 0 | 10 | 10 | 70.5           | 21.0   | 1.42      | 0.151   | 0.321          |                | 0.4%                  |
| vs Tazmetostat 250 mg/kg           |                      |   |    |    |                | 2.0    | 1.03      | 0.667   | 0.821          |                |                       |
| vs Tazmetostat 400 mg/kg           |                      |   |    |    |                | 10.5   | 1.18      | 0.459   | 0.624          |                |                       |
| Tazemetostat 250 mg/kg + XRT       | 10                   | 0 | 10 | 10 | 108.0          | 58.5   | 2.18      | 0.002   | < 0.001        |                | 0.6%                  |
| vs Tazmetostat 250 mg/kg           |                      |   |    |    |                | 39.5   | 1.58      | 0.007   | 0.011          |                |                       |
| Tazemetostat 250 mg/kg + Cis       | 10                   | 0 | 10 | 10 | 67.5           | 18.0   | 1.36      | 0.164   | 0.145          |                | 5.9%                  |
| vs Tazmetostat 250 mg/kg           |                      |   |    |    |                | -1.0   | 0.99      | 0.993   | 0.598          |                |                       |
| Tazemetostat 250 mg/kg + XRT + Cis | 10                   | 1 | 9  | 9  | 76.0           | 26.5   | 1.54      | 0.007   | 0.002          |                | 0.0%                  |
| vs Tazmetostat 250 mg/kg           |                      |   |    |    |                | 7.5    | 1.11      | 0.259   | 0.164          |                |                       |
| XRT                                |                      |   |    |    |                | -32.0  | 0.70      | 0.260   | 0.041          |                |                       |
| Cis                                |                      |   |    |    |                | -8.5   | 0.89      | 0.578   | 0.176          |                |                       |
| <b>Model ICb-1572MB</b>            |                      |   |    |    |                |        |           |         |                |                |                       |
| Control (vehicle)                  | 10                   | 1 | 9  | 9  | 25.0           |        |           |         |                |                | NA                    |

|                                    |    |   |    |    |       |      |      |         |         |       |
|------------------------------------|----|---|----|----|-------|------|------|---------|---------|-------|
| Tazemetostat 250 mg/kg             | 10 | 0 | 10 | 10 | 25.0  | 0.0  | 1.00 | 0.966   | 0.560   | 35.6% |
| Tazemetostat 400 mg/kg             | 10 | 0 | 10 | 10 | 27.0  | 2.0  | 1.08 | 0.531   | 0.207   | 30.7% |
| vs Tazmetostat 250 mg/kg           |    |   |    |    |       | 2.0  | 1.08 | 0.276   | 0.200   |       |
| XRT                                | 10 | 0 | 10 | 10 | 21.5  | -3.5 | 0.86 | 0.256   | 0.234   | NA    |
| vs Tazmetostat 250 mg/kg           |    |   |    |    |       | -3.5 | 0.86 | 0.365   | 0.068   |       |
| vs Tazmetostat 400 mg/kg           |    |   |    |    |       | -5.5 | 0.80 | 0.197   | 0.061   |       |
| Cisplatin                          | 10 | 0 | 10 | 10 | 26.0  | 1.0  | 1.04 | 0.563   | 0.505   | 24.7% |
| vs Tazmetostat 250 mg/kg           |    |   |    |    |       | 1.0  | 1.04 | 0.623   | 0.848   |       |
| vs Tazmetostat 400 mg/kg           |    |   |    |    |       | -1.0 | 0.96 | 0.346   | 0.279   |       |
| Tazemetostat 250 mg/kg + XRT       | 10 | 1 | 9  | 9  | 27.0  | 2.0  | 1.08 | 0.235   | 0.049   | 15.5% |
| vs Tazmetostat 250 mg/kg           |    |   |    |    |       | 2.0  | 1.08 | 0.021   | 0.023   |       |
| Tazemetostat 250 mg/kg + Cisplatin | 10 | 0 | 10 | 10 | 28.0  | 3.0  | 1.12 | 0.267   | 0.063   | 32.4% |
| vs Tazmetostat 250 mg/kg           |    |   |    |    |       | 3.0  | 1.12 | 0.021   | 0.036   |       |
| Tazemetostat 250 mg/kg + XRT + Cis | 10 | 0 | 10 | 10 | 32.0  | 7.0  | 1.28 | 0.112   | 0.004   | 14.1% |
| vs Tazmetostat 250 mg/kg           |    |   |    |    |       | 7.0  | 1.28 | < 0.001 | < 0.001 |       |
| XRT                                |    |   |    |    |       | 5.0  | 1.19 | 0.024   | 0.013   |       |
| Cis                                |    |   |    |    |       | -4.0 | 0.88 | 0.502   | 0.156   |       |
| <b>Model IC-L1115ATRT</b>          |    |   |    |    |       |      |      |         |         |       |
| Control (vehicle)                  | 10 | 0 | 10 | 10 | 70.5  |      |      |         |         | 2.9%  |
| Tazemetostat 250 mg/kg             | 10 | 0 | 10 | 10 | 98.0  | 27.5 | 1.39 | 0.303   | 0.232   | 0.0%  |
| Tazemetostat 400 mg/kg             | 10 | 0 | 10 | 10 | 141.5 | 71.0 | 2.01 | 0.006   | 0.006   | 3.0%  |
| vs Tazmetostat 250 mg/kg           |    |   |    |    |       | 43.5 | 1.44 | 0.038   | 0.037   |       |
| Cisplatin                          | 10 | 0 | 10 | 10 | 150.0 | 79.5 | 2.13 | 0.005   | < 0.001 | 7.1%  |
| vs Tazmetostat 250 mg/kg           |    |   |    |    |       | 52.0 | 1.53 | < 0.001 | < 0.001 |       |
| vs Tazmetostat 400 mg/kg           |    |   |    |    |       | 8.5  | 1.06 | 0.512   | 0.850   |       |
| Tazemetostat 250 mg/kg + Cisplatin | 10 | 0 | 10 | 10 | 142.5 | 72.0 | 2.02 | 0.013   | < 0.001 | 4.3%  |
| vs Tazmetostat 250 mg/kg           |    |   |    |    |       | 44.5 | 1.45 | 0.034   | 0.008   |       |

## Glossary

|            |                                                  |
|------------|--------------------------------------------------|
| <b>N</b>   | total number of mice entering experiment         |
| <b>Nx</b>  | number of additional mice excluded from analysis |
| <b>Na</b>  | number of mice in analysis                       |
| <b>Nev</b> | number of events                                 |

**KM med**  
**EFS T-C**  
**EFS T/C**

Kaplan-Meier estimate of median time-to-event (days)  
Event free survival differences in days between the treated (**T**) and the control (**C**)  
Fold differences of event free survival between the treated (T) and the control (C)

**IC**  
**ICb**

Intracerebral  
Intra-cerebellar

L1115A TRT

Untreated

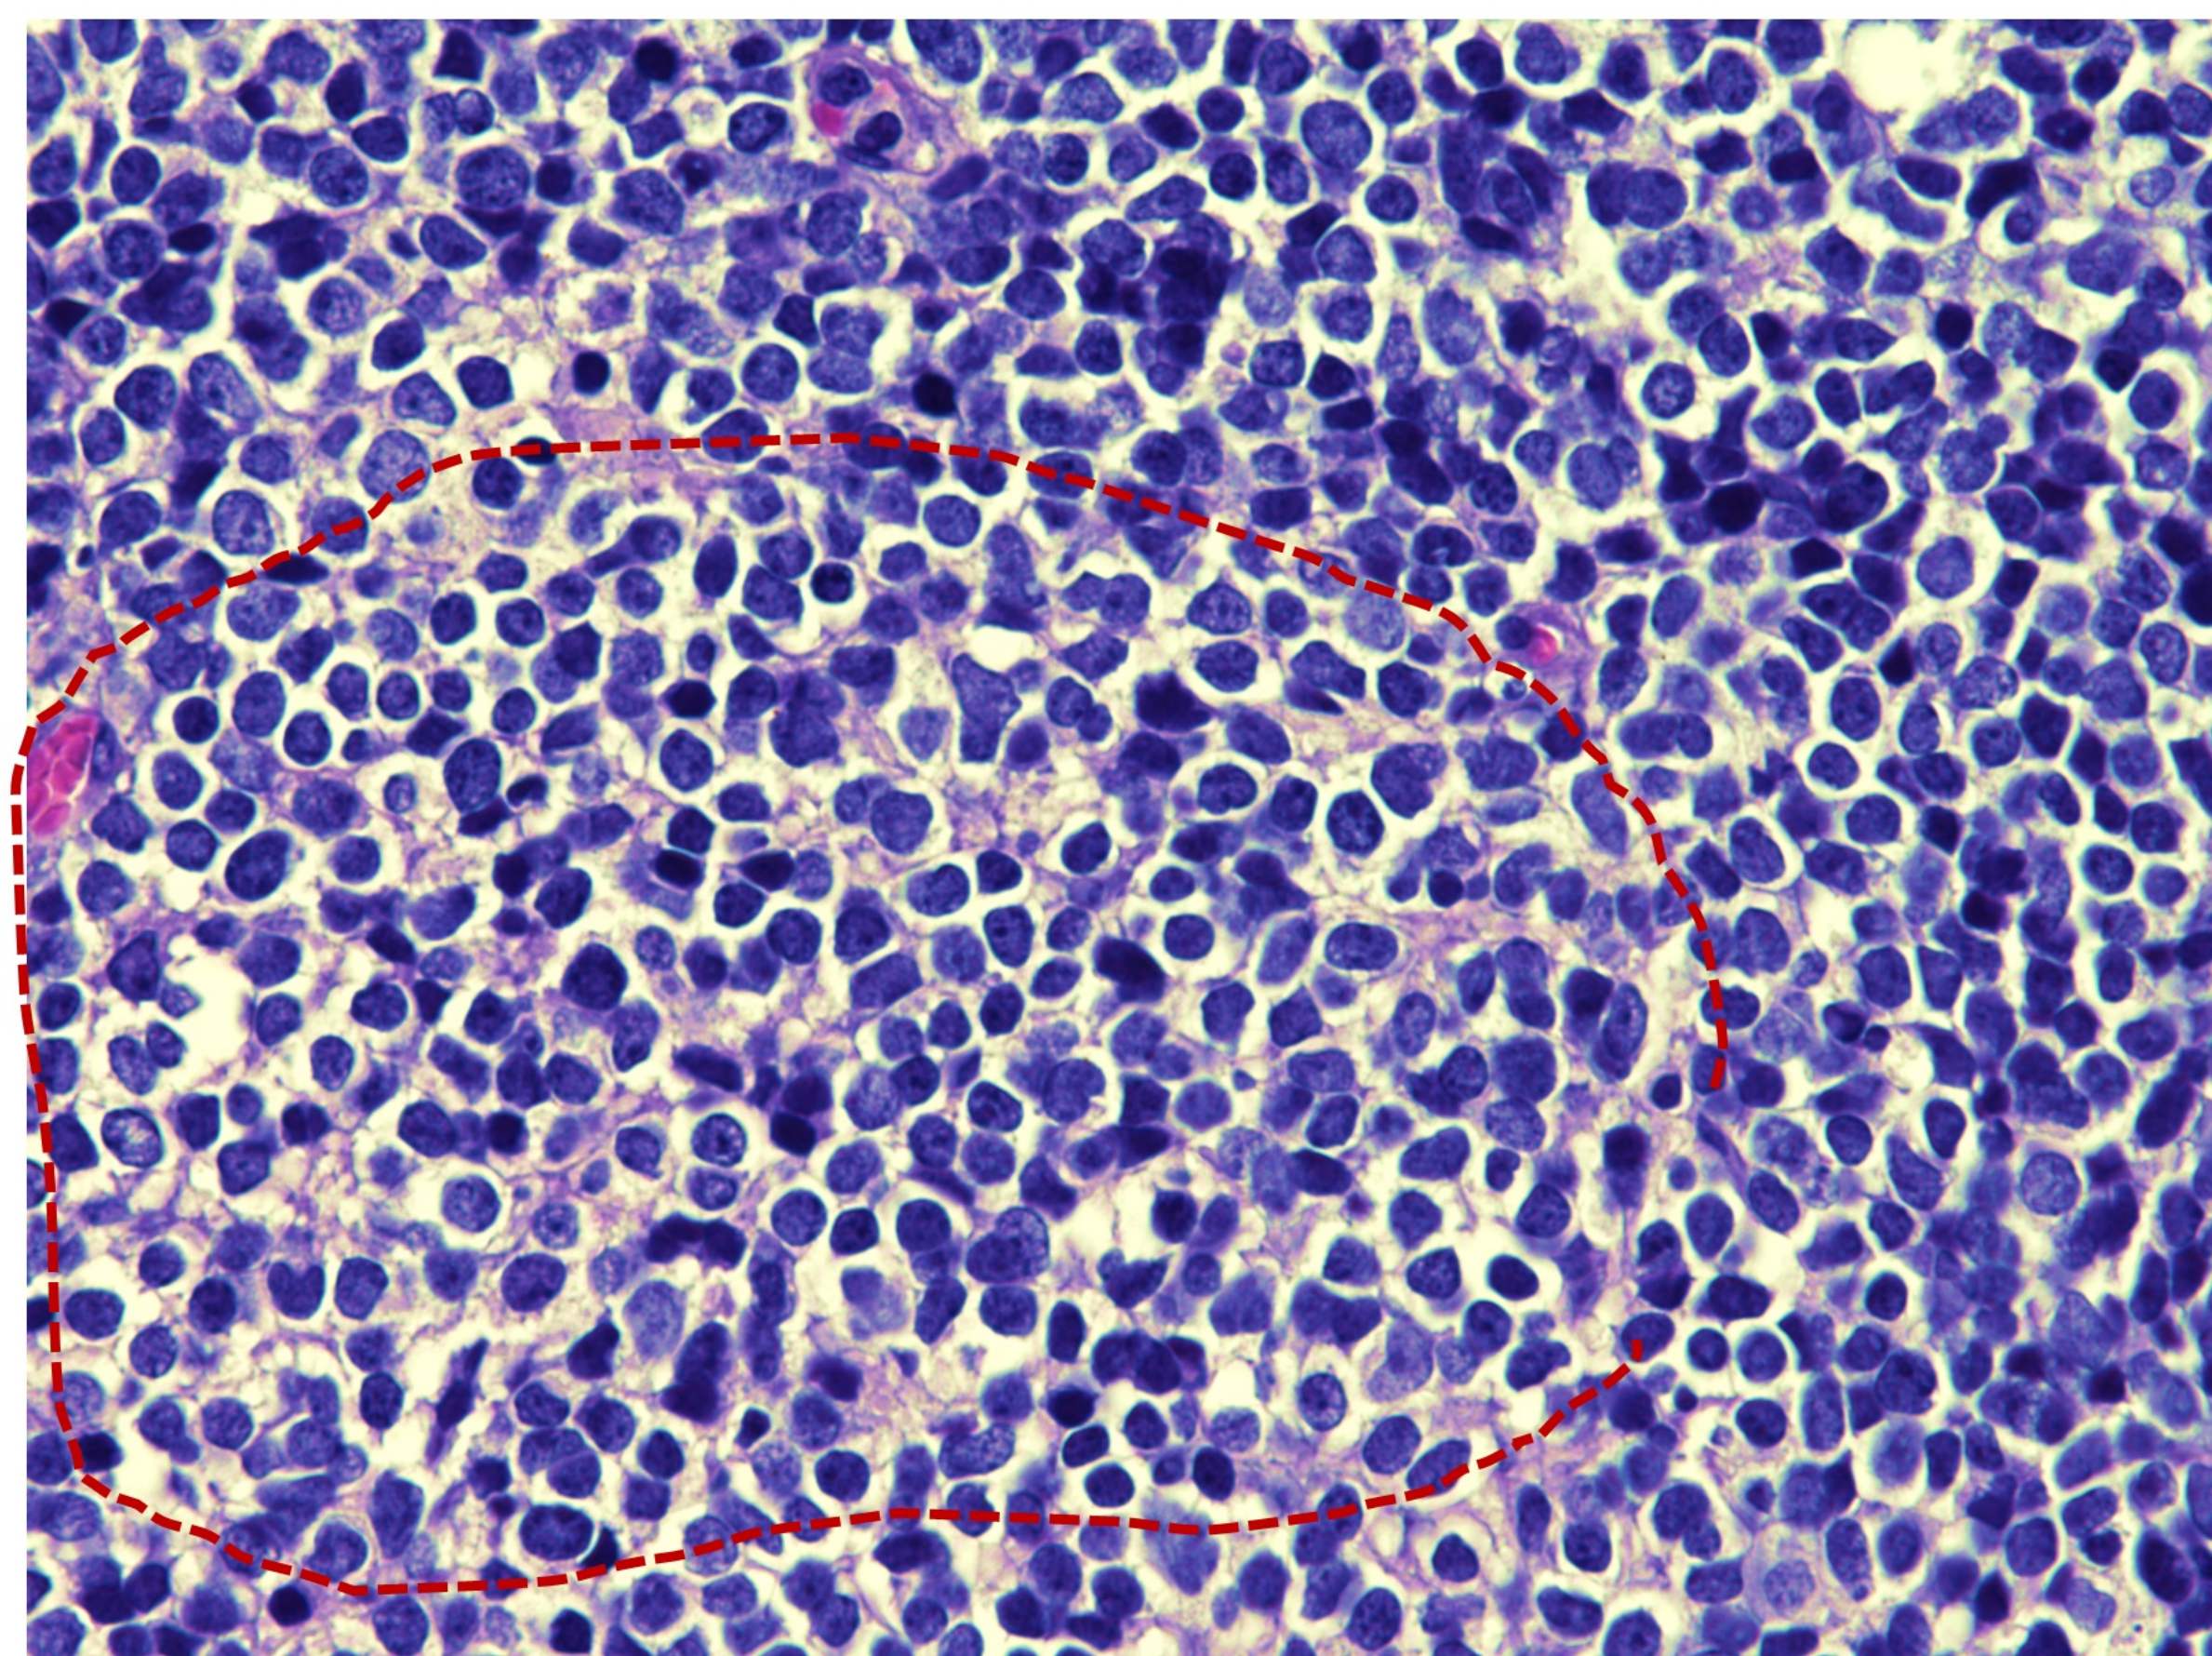

EZH2

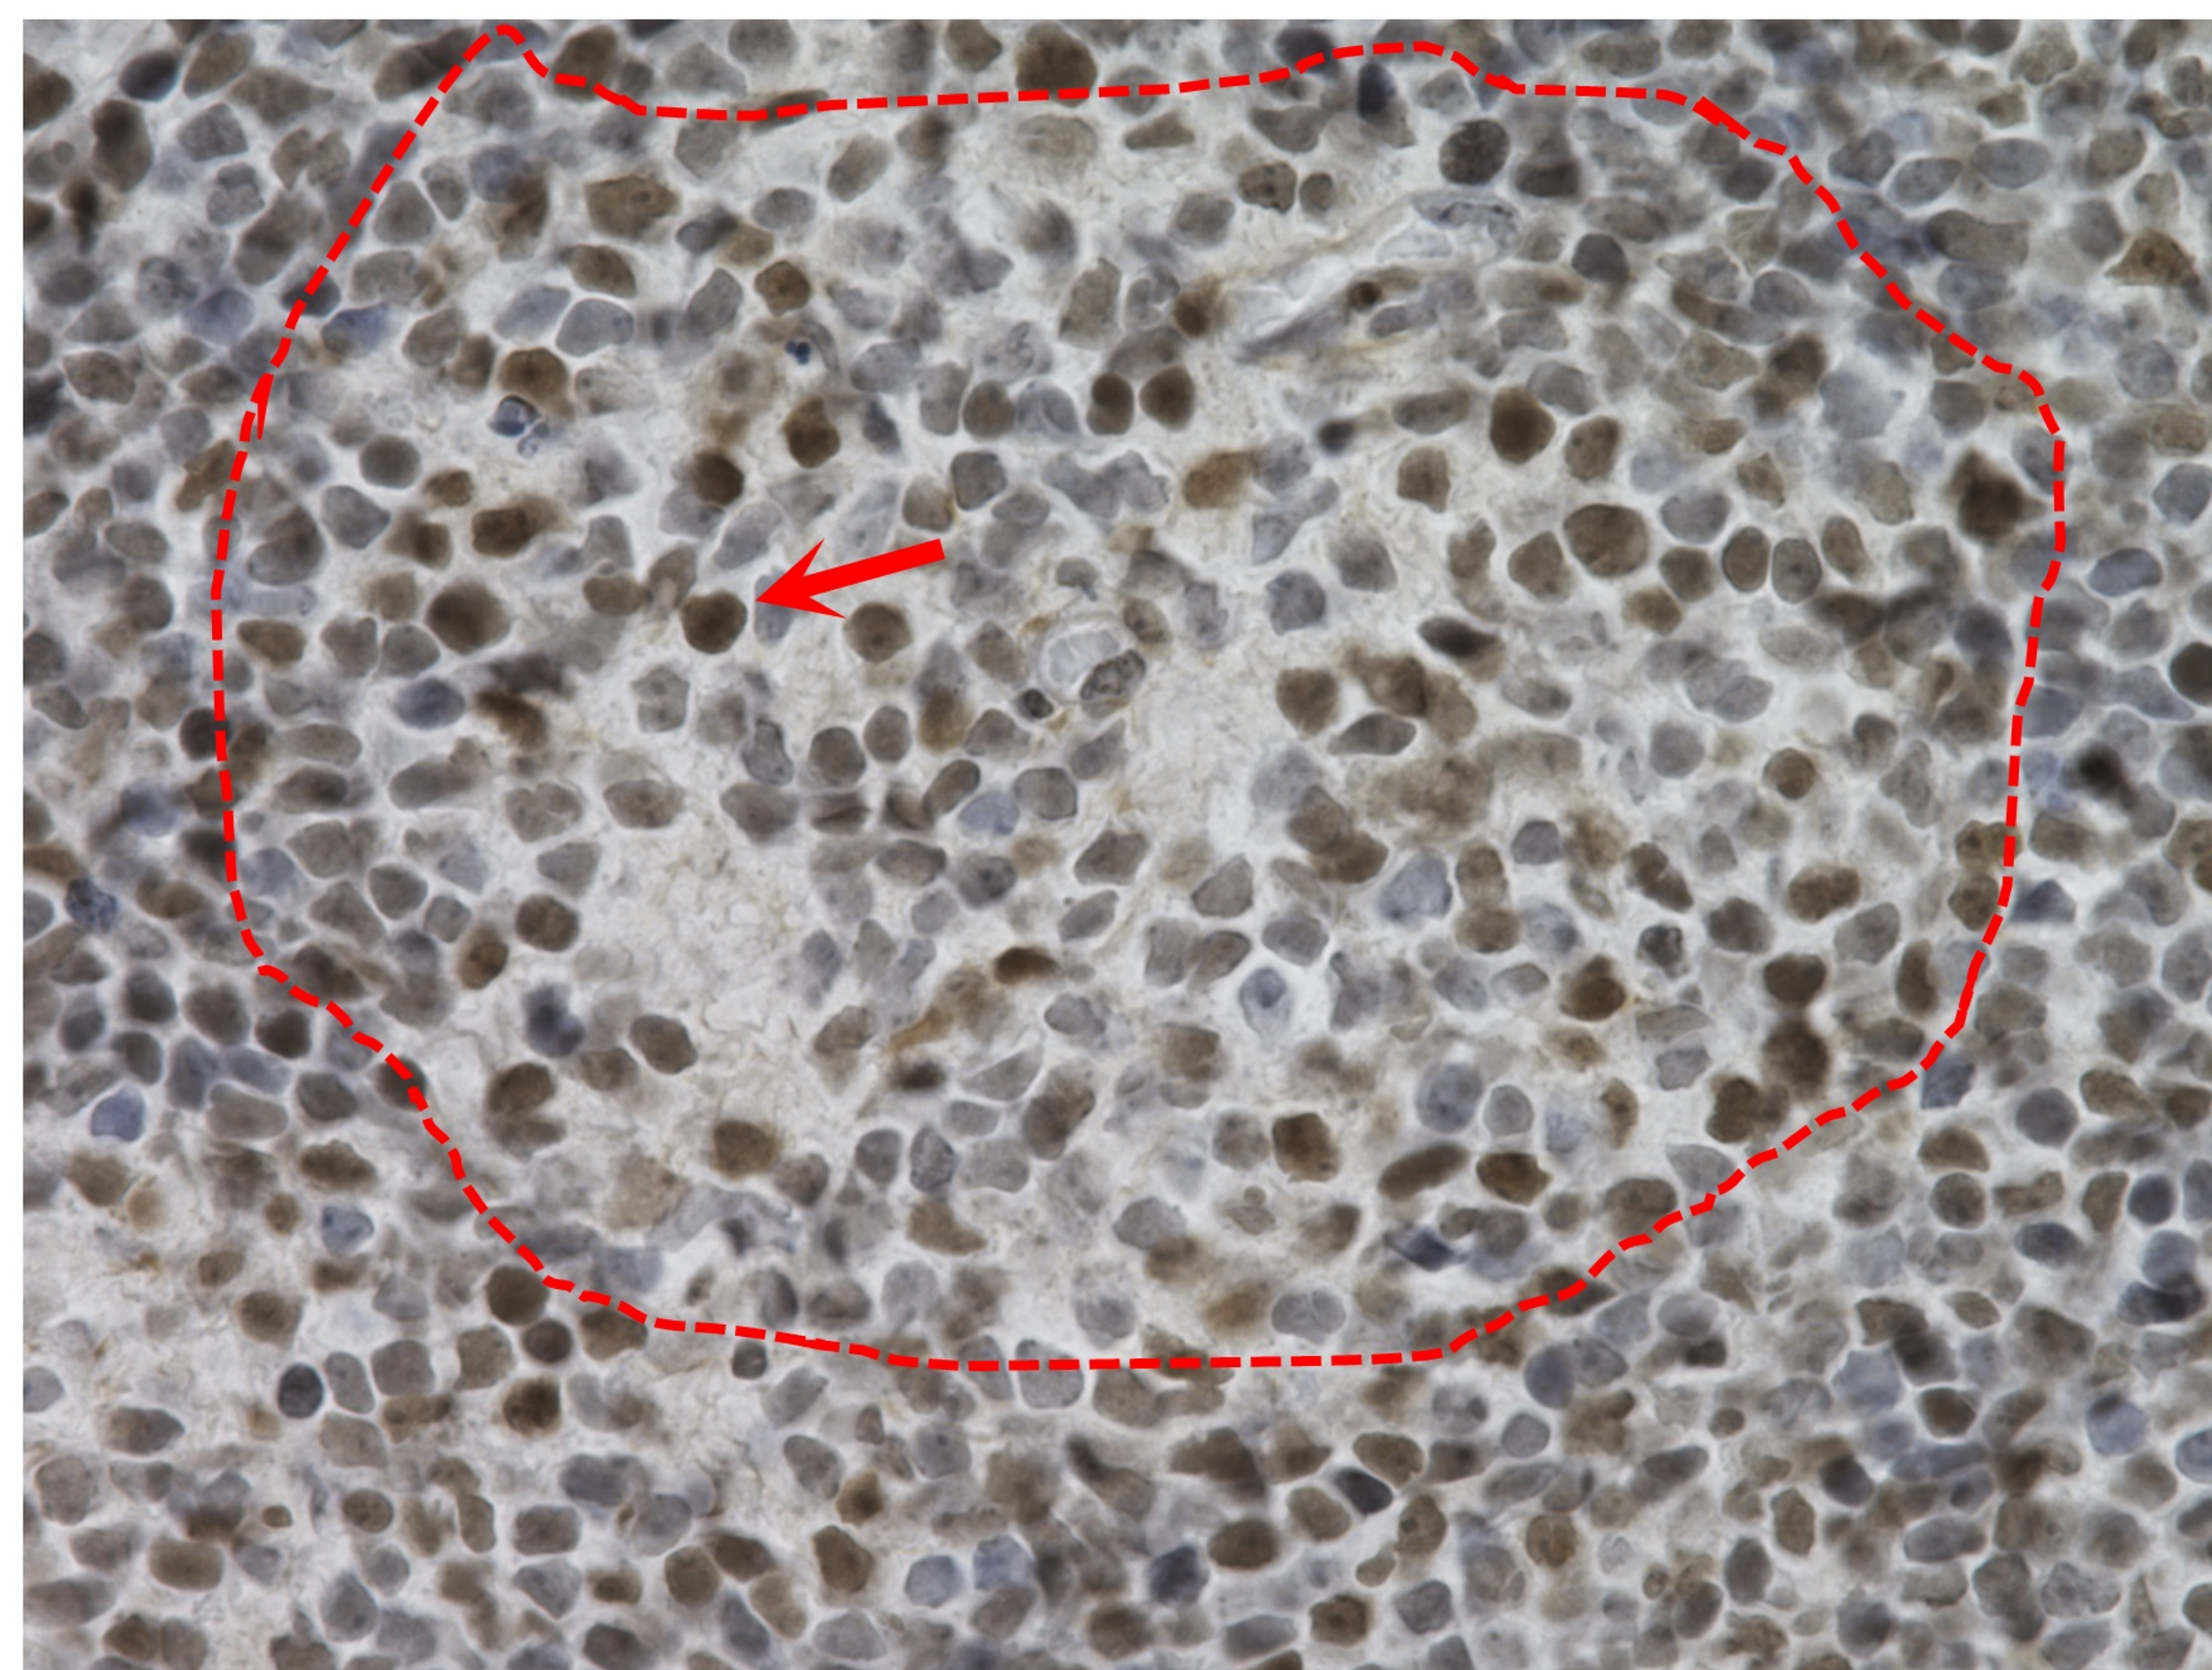

me3

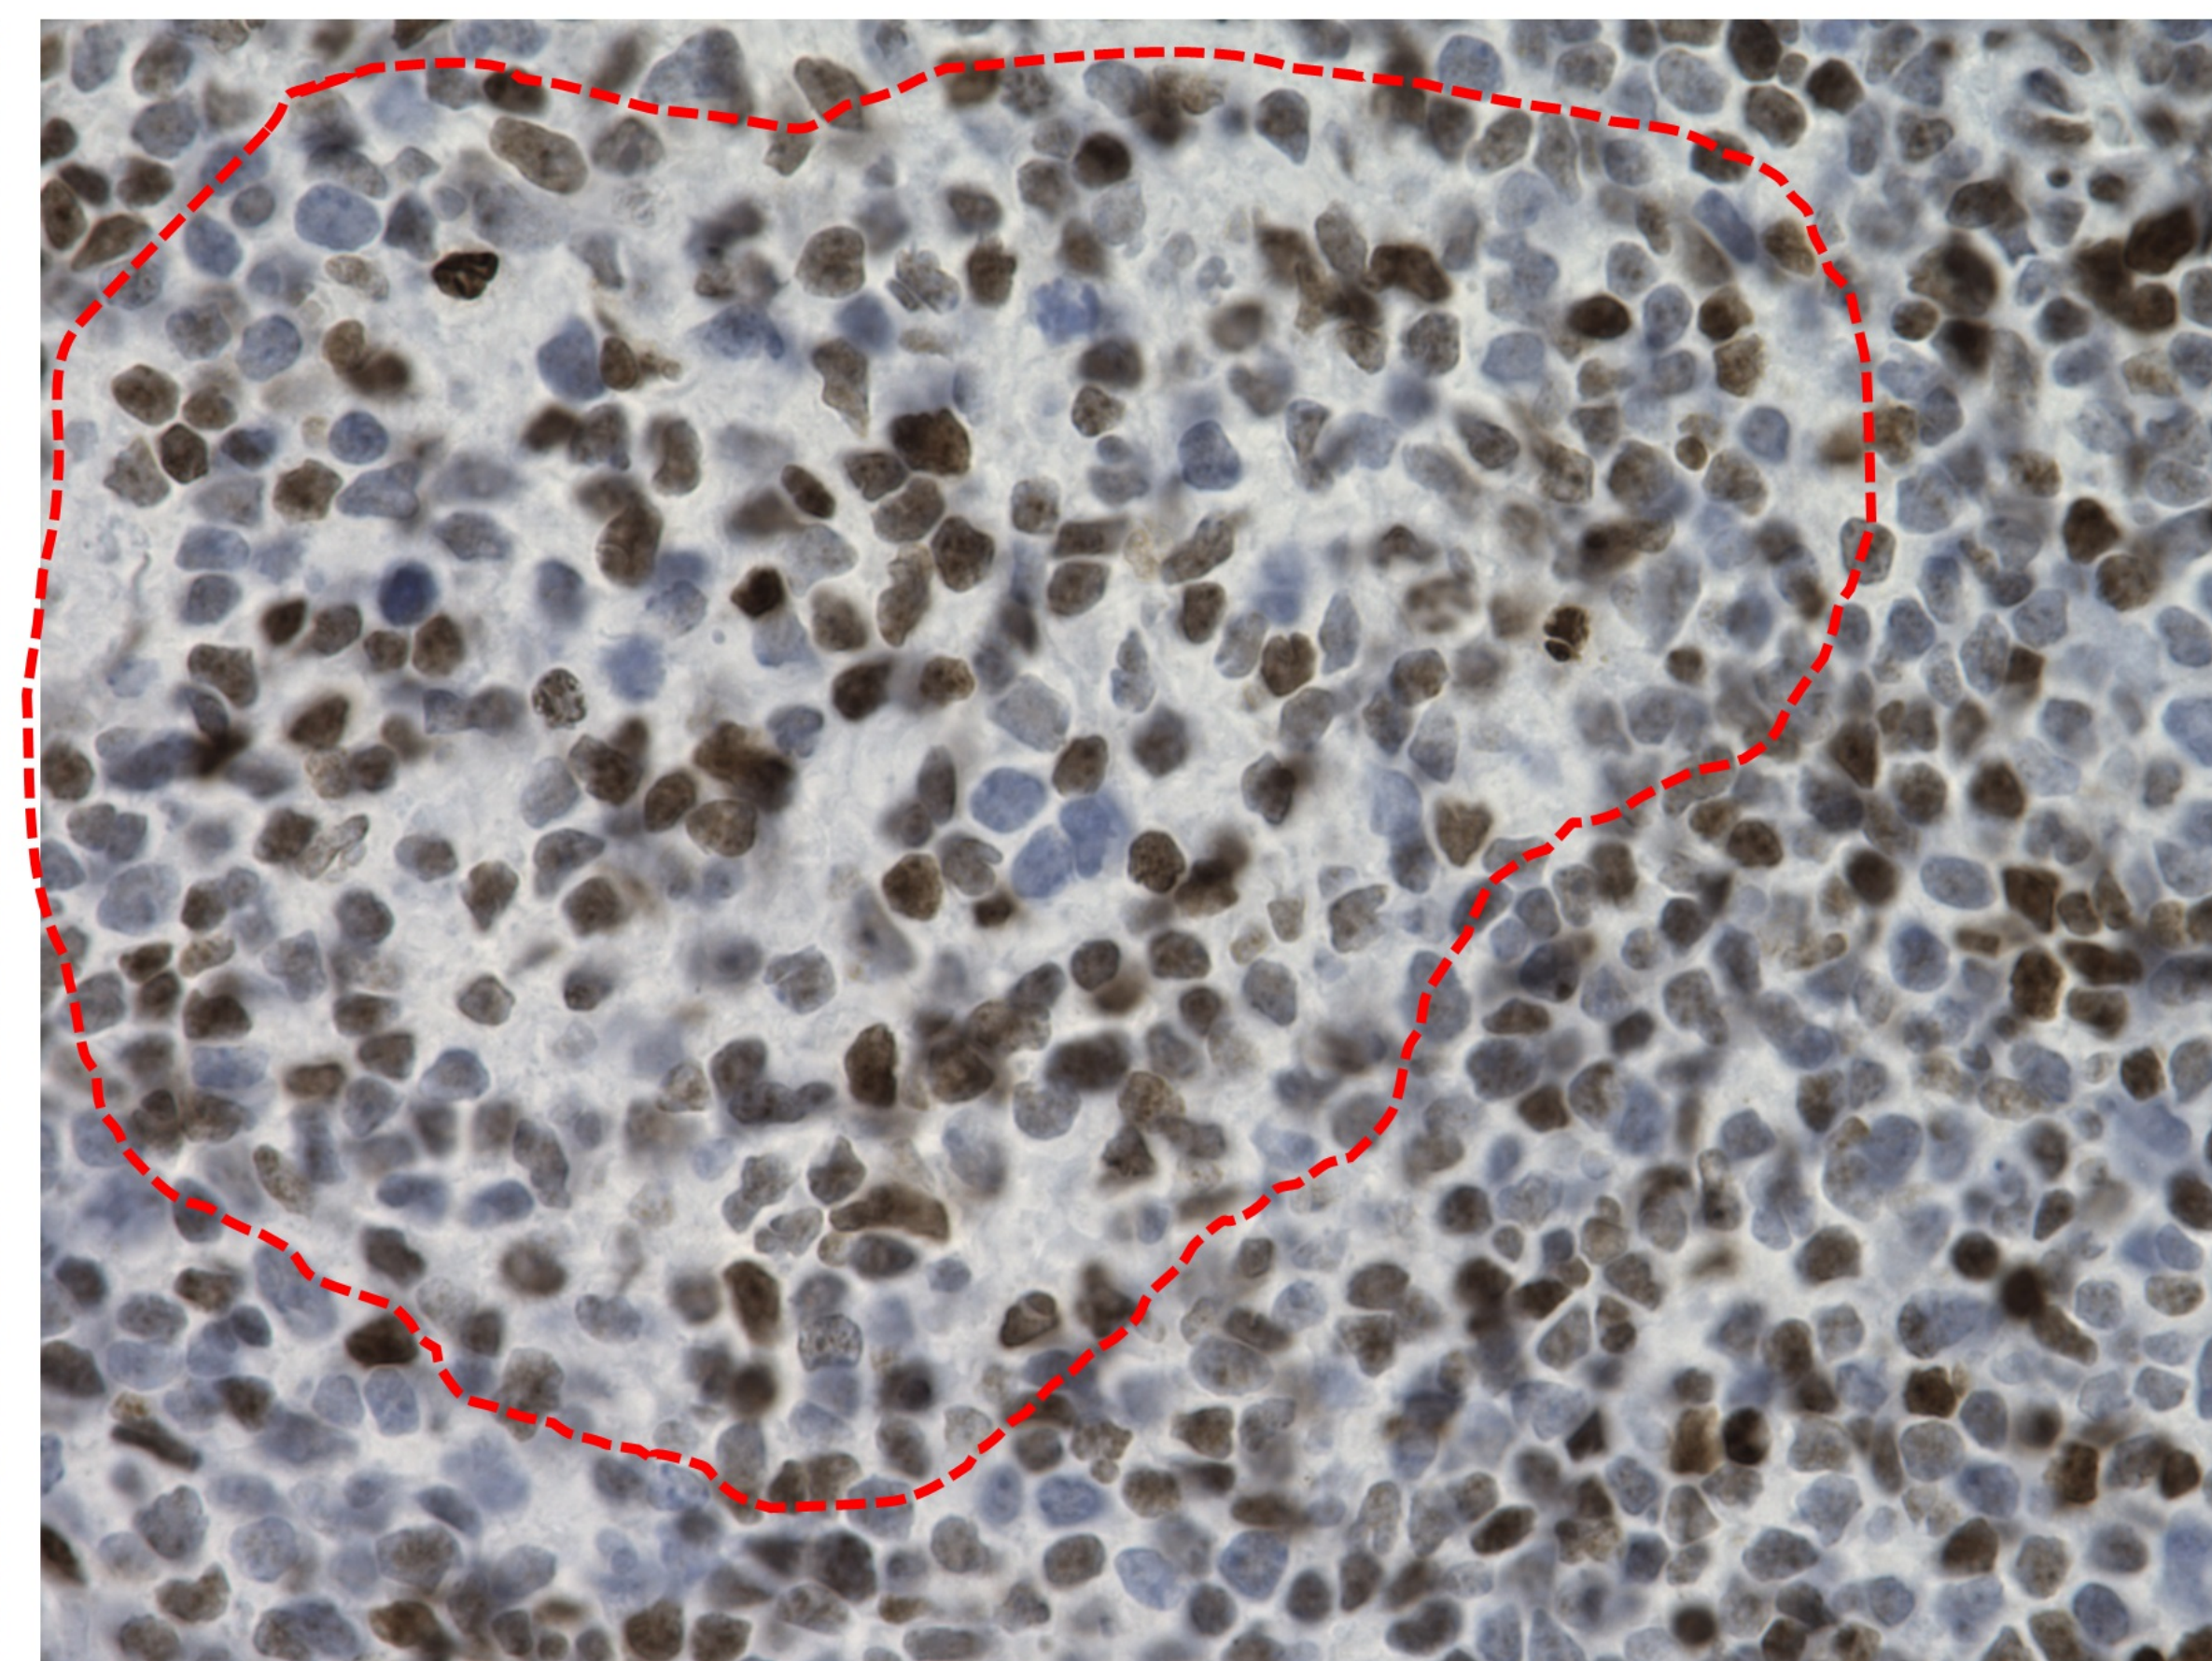

me2

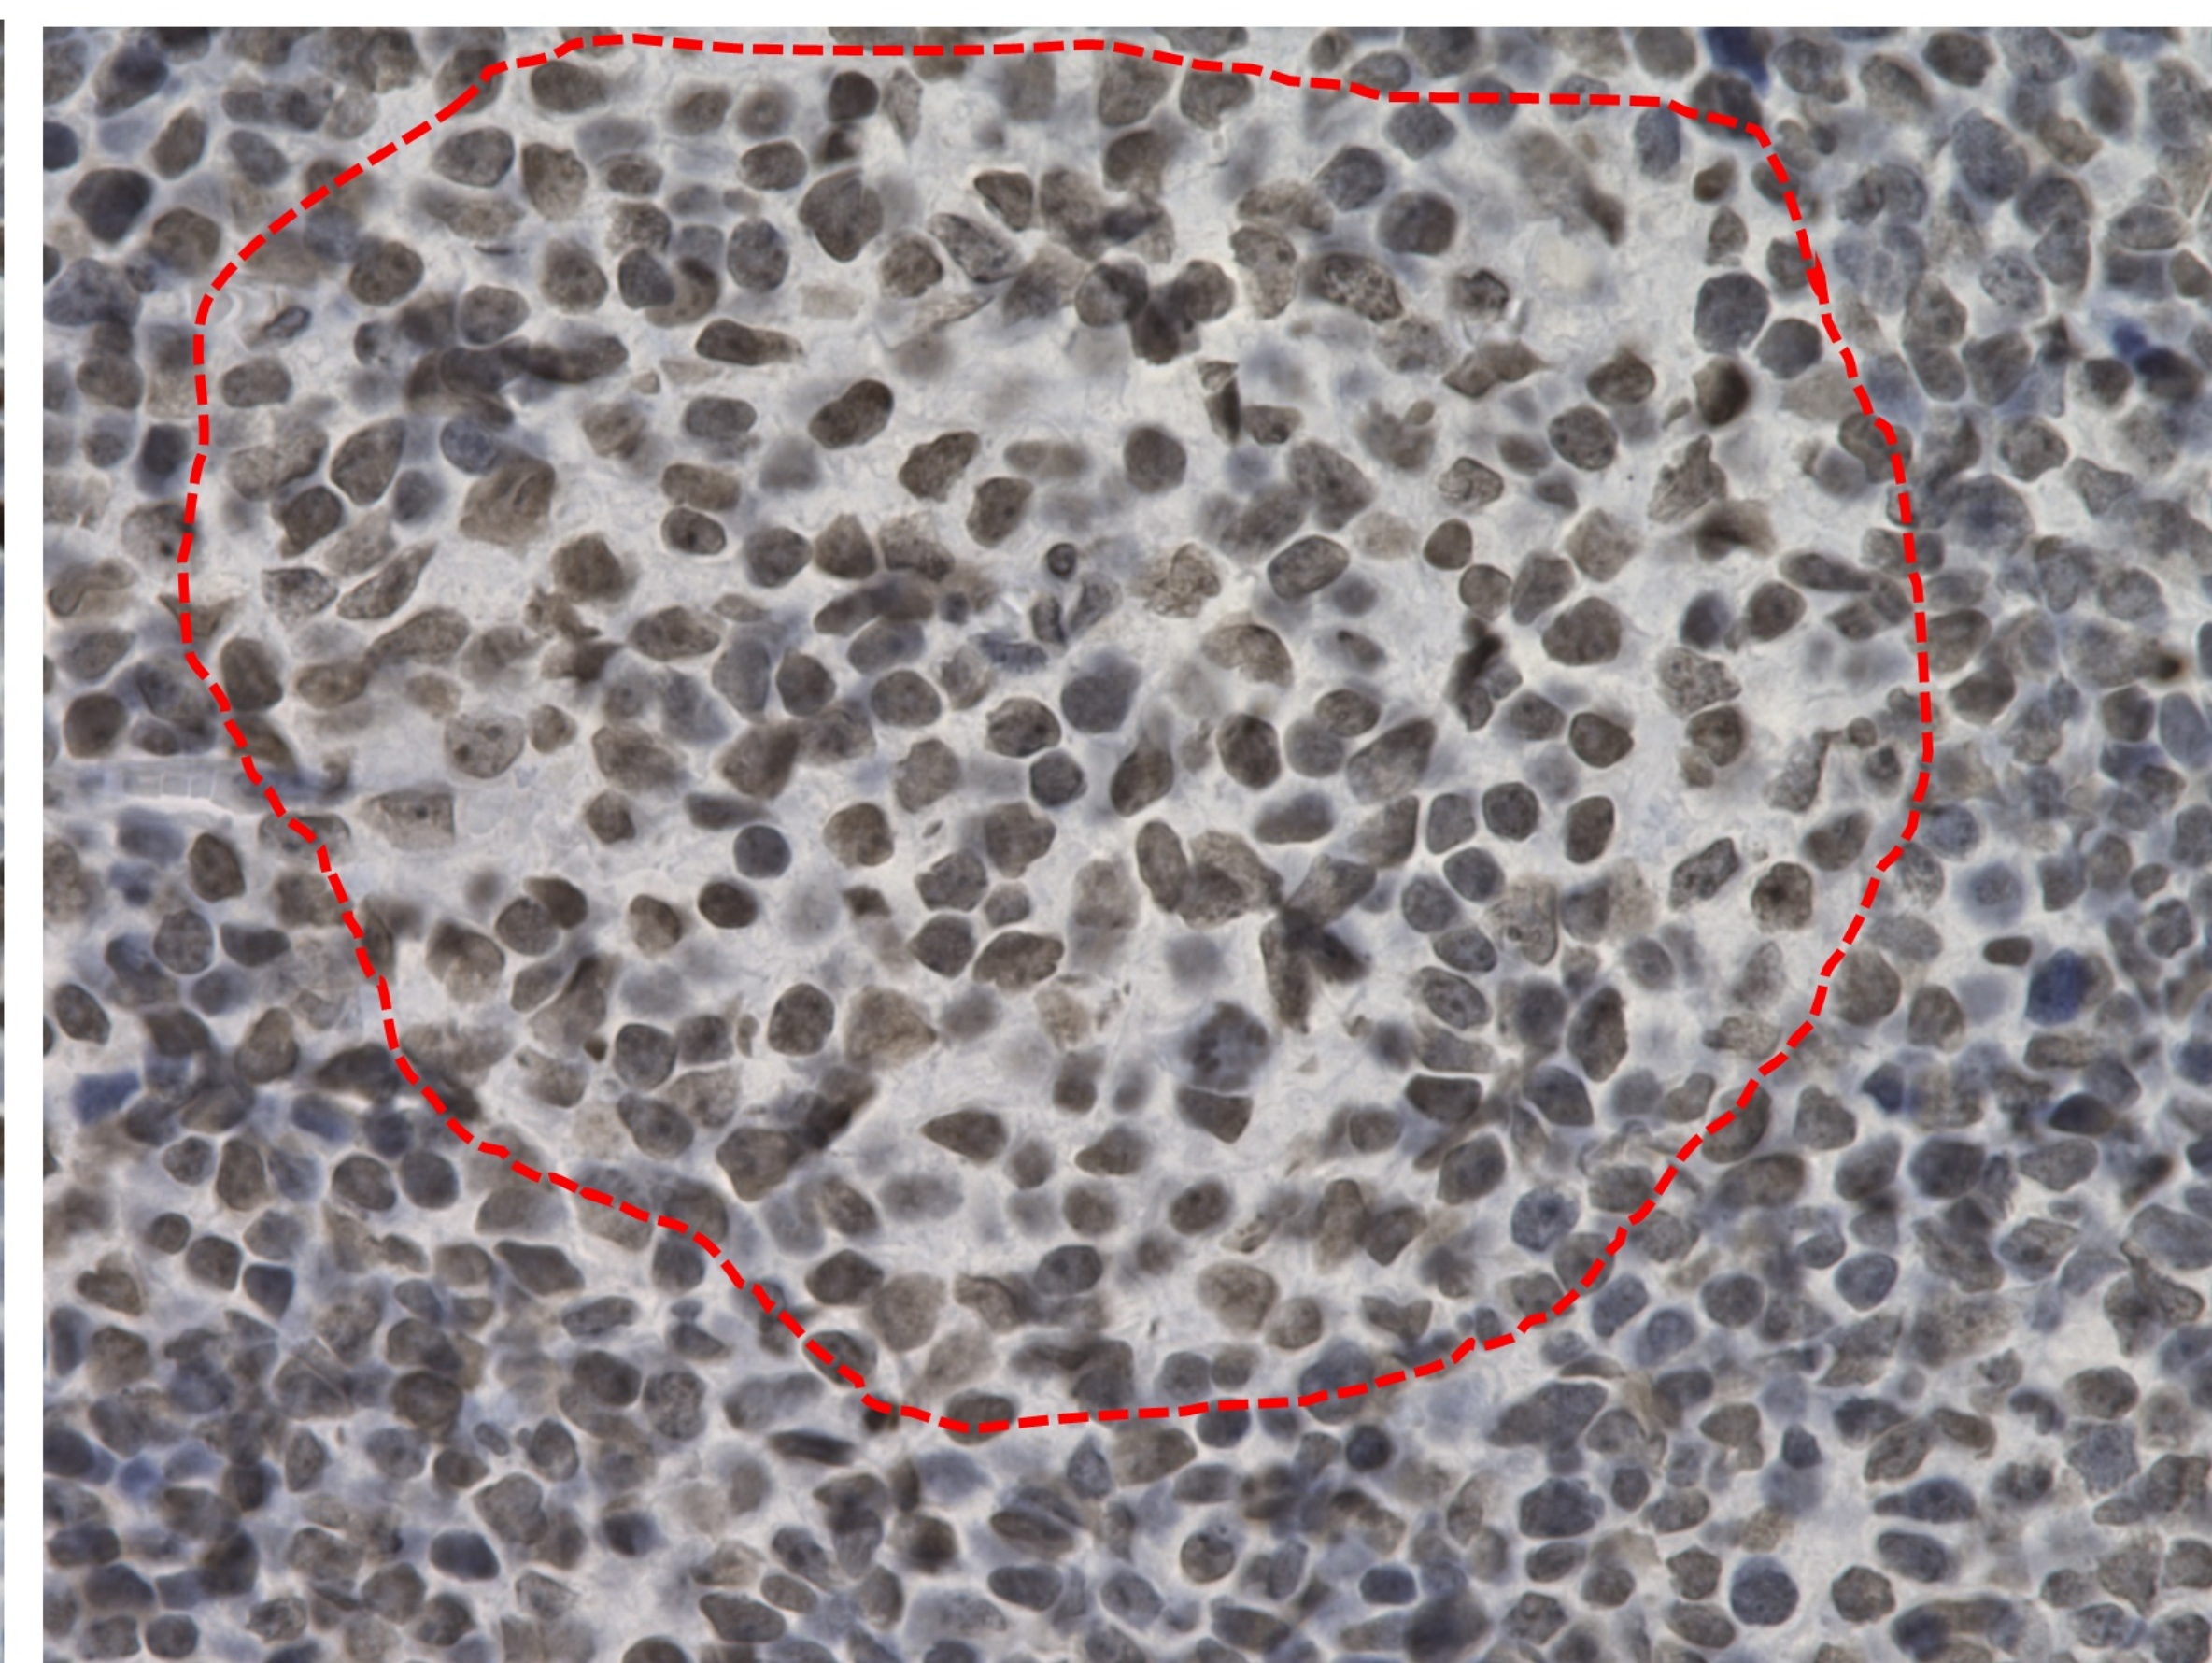

H3K27

Treated

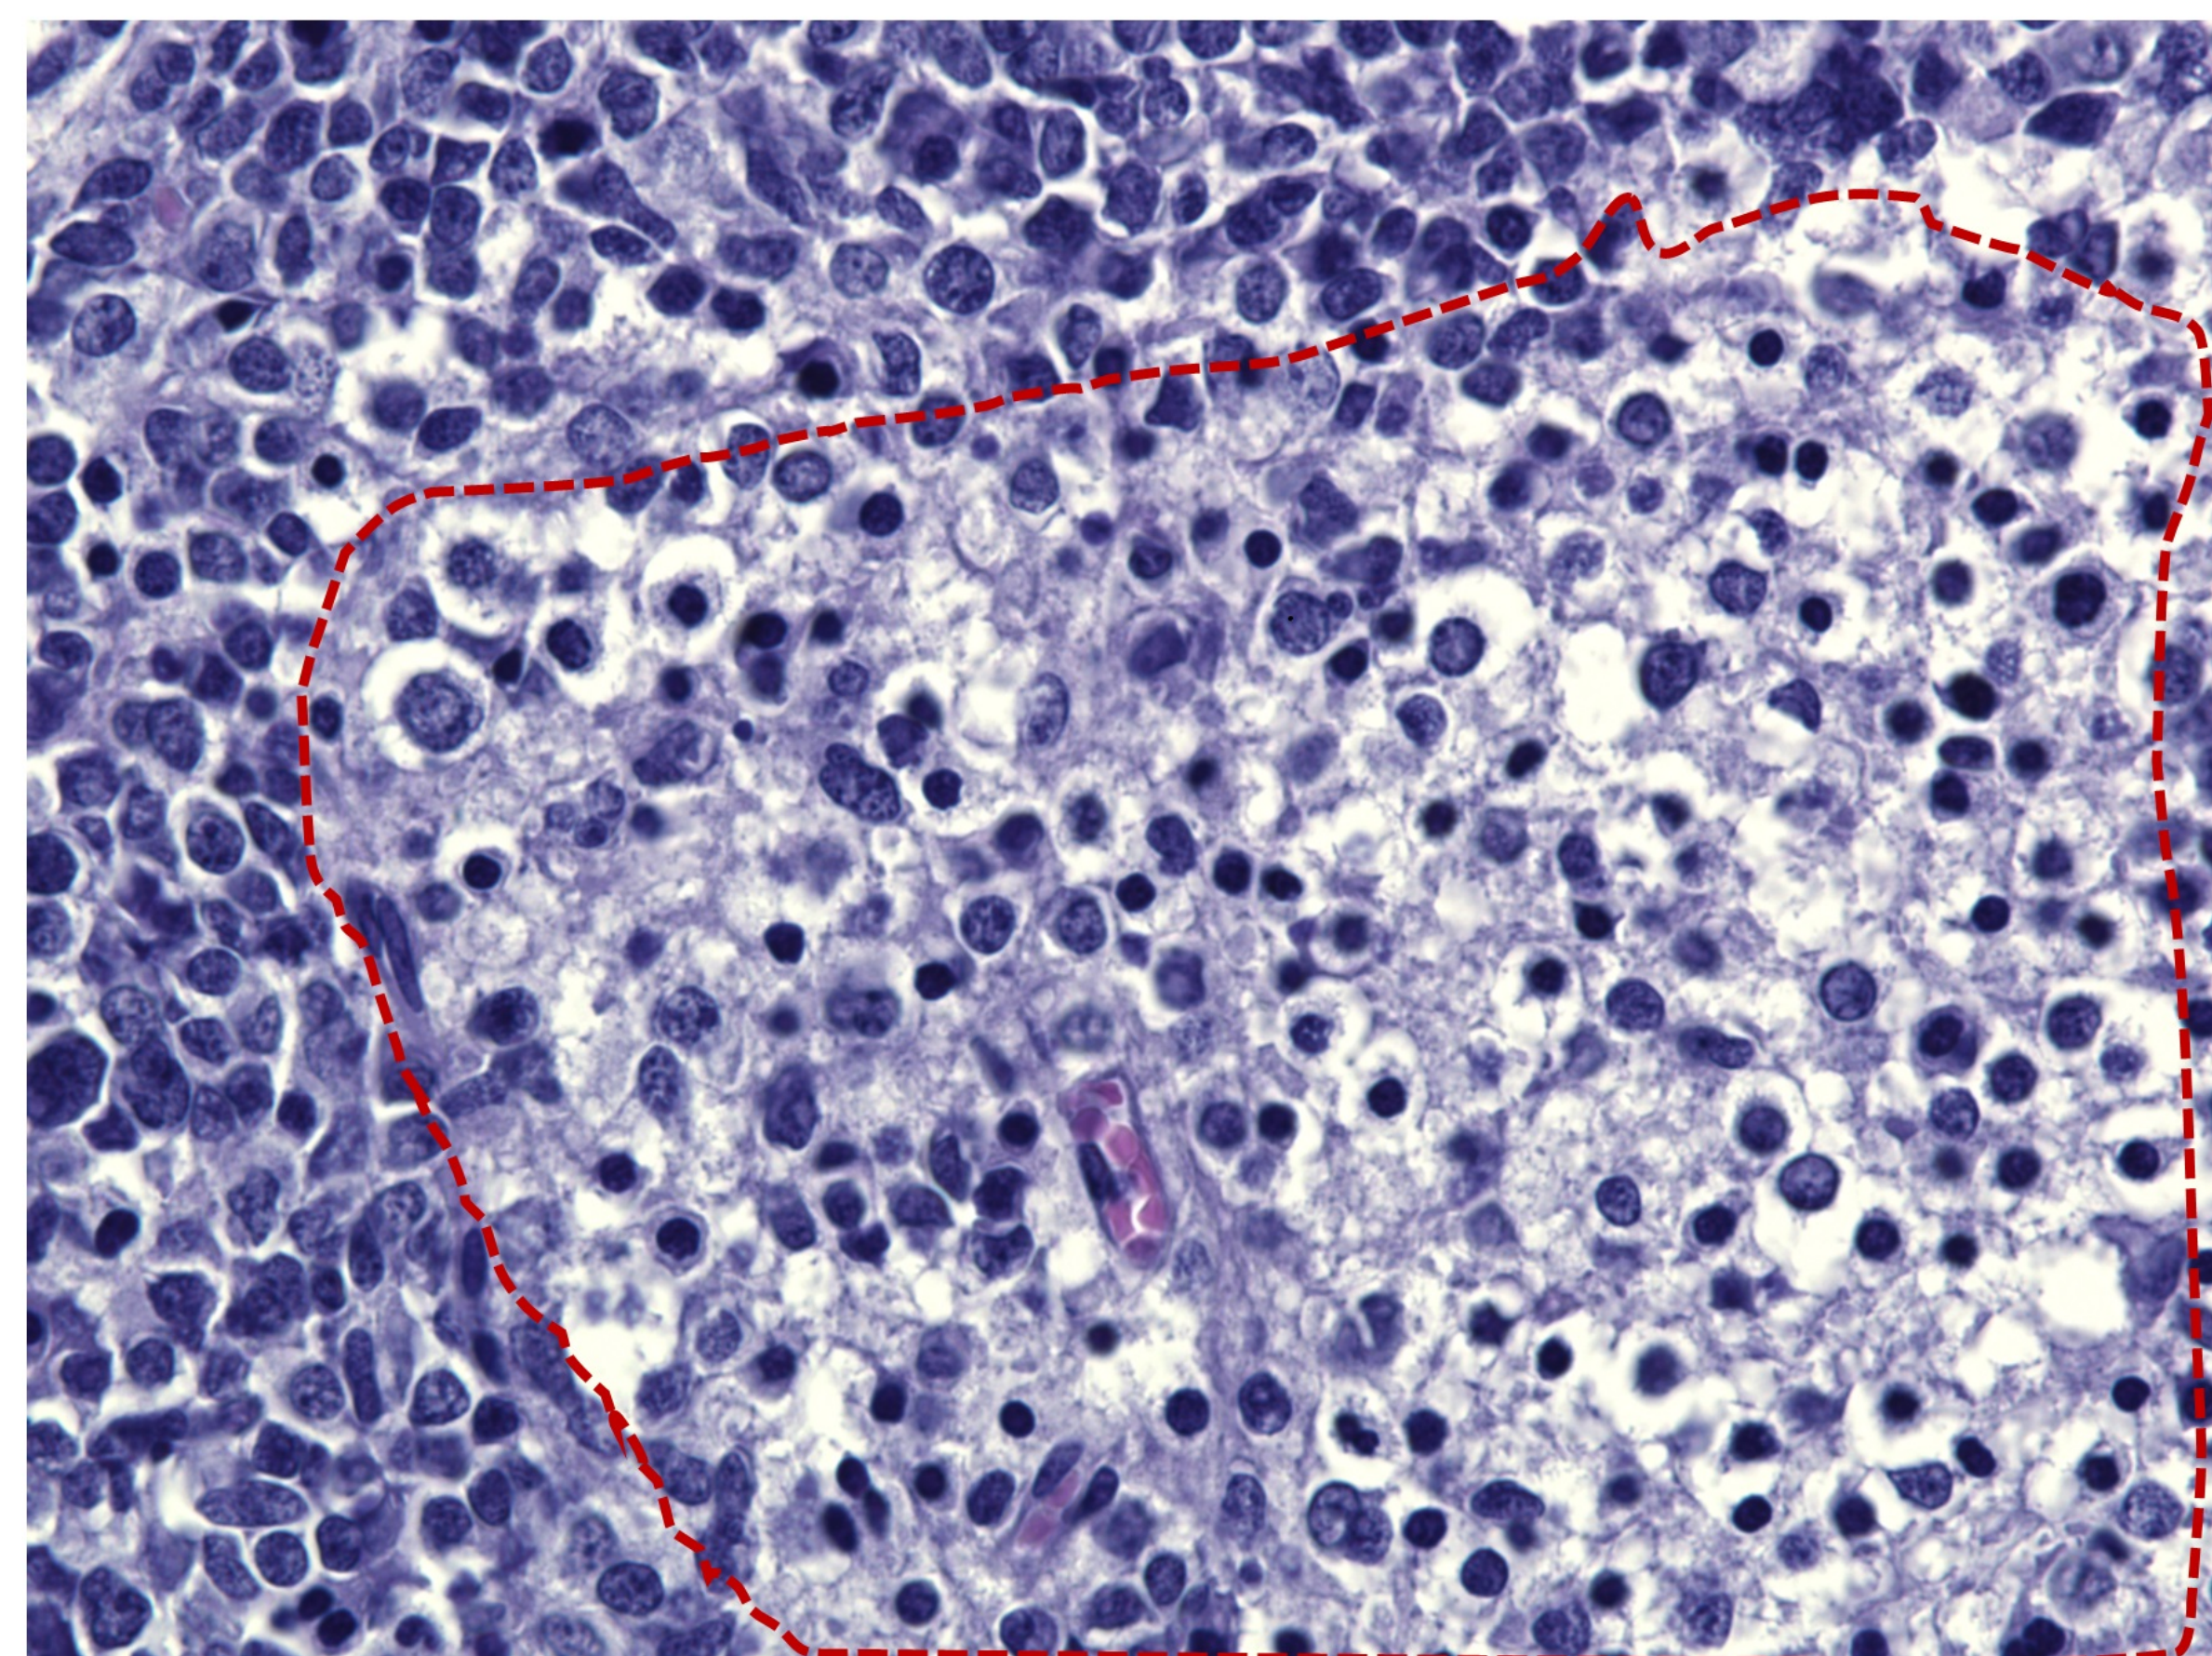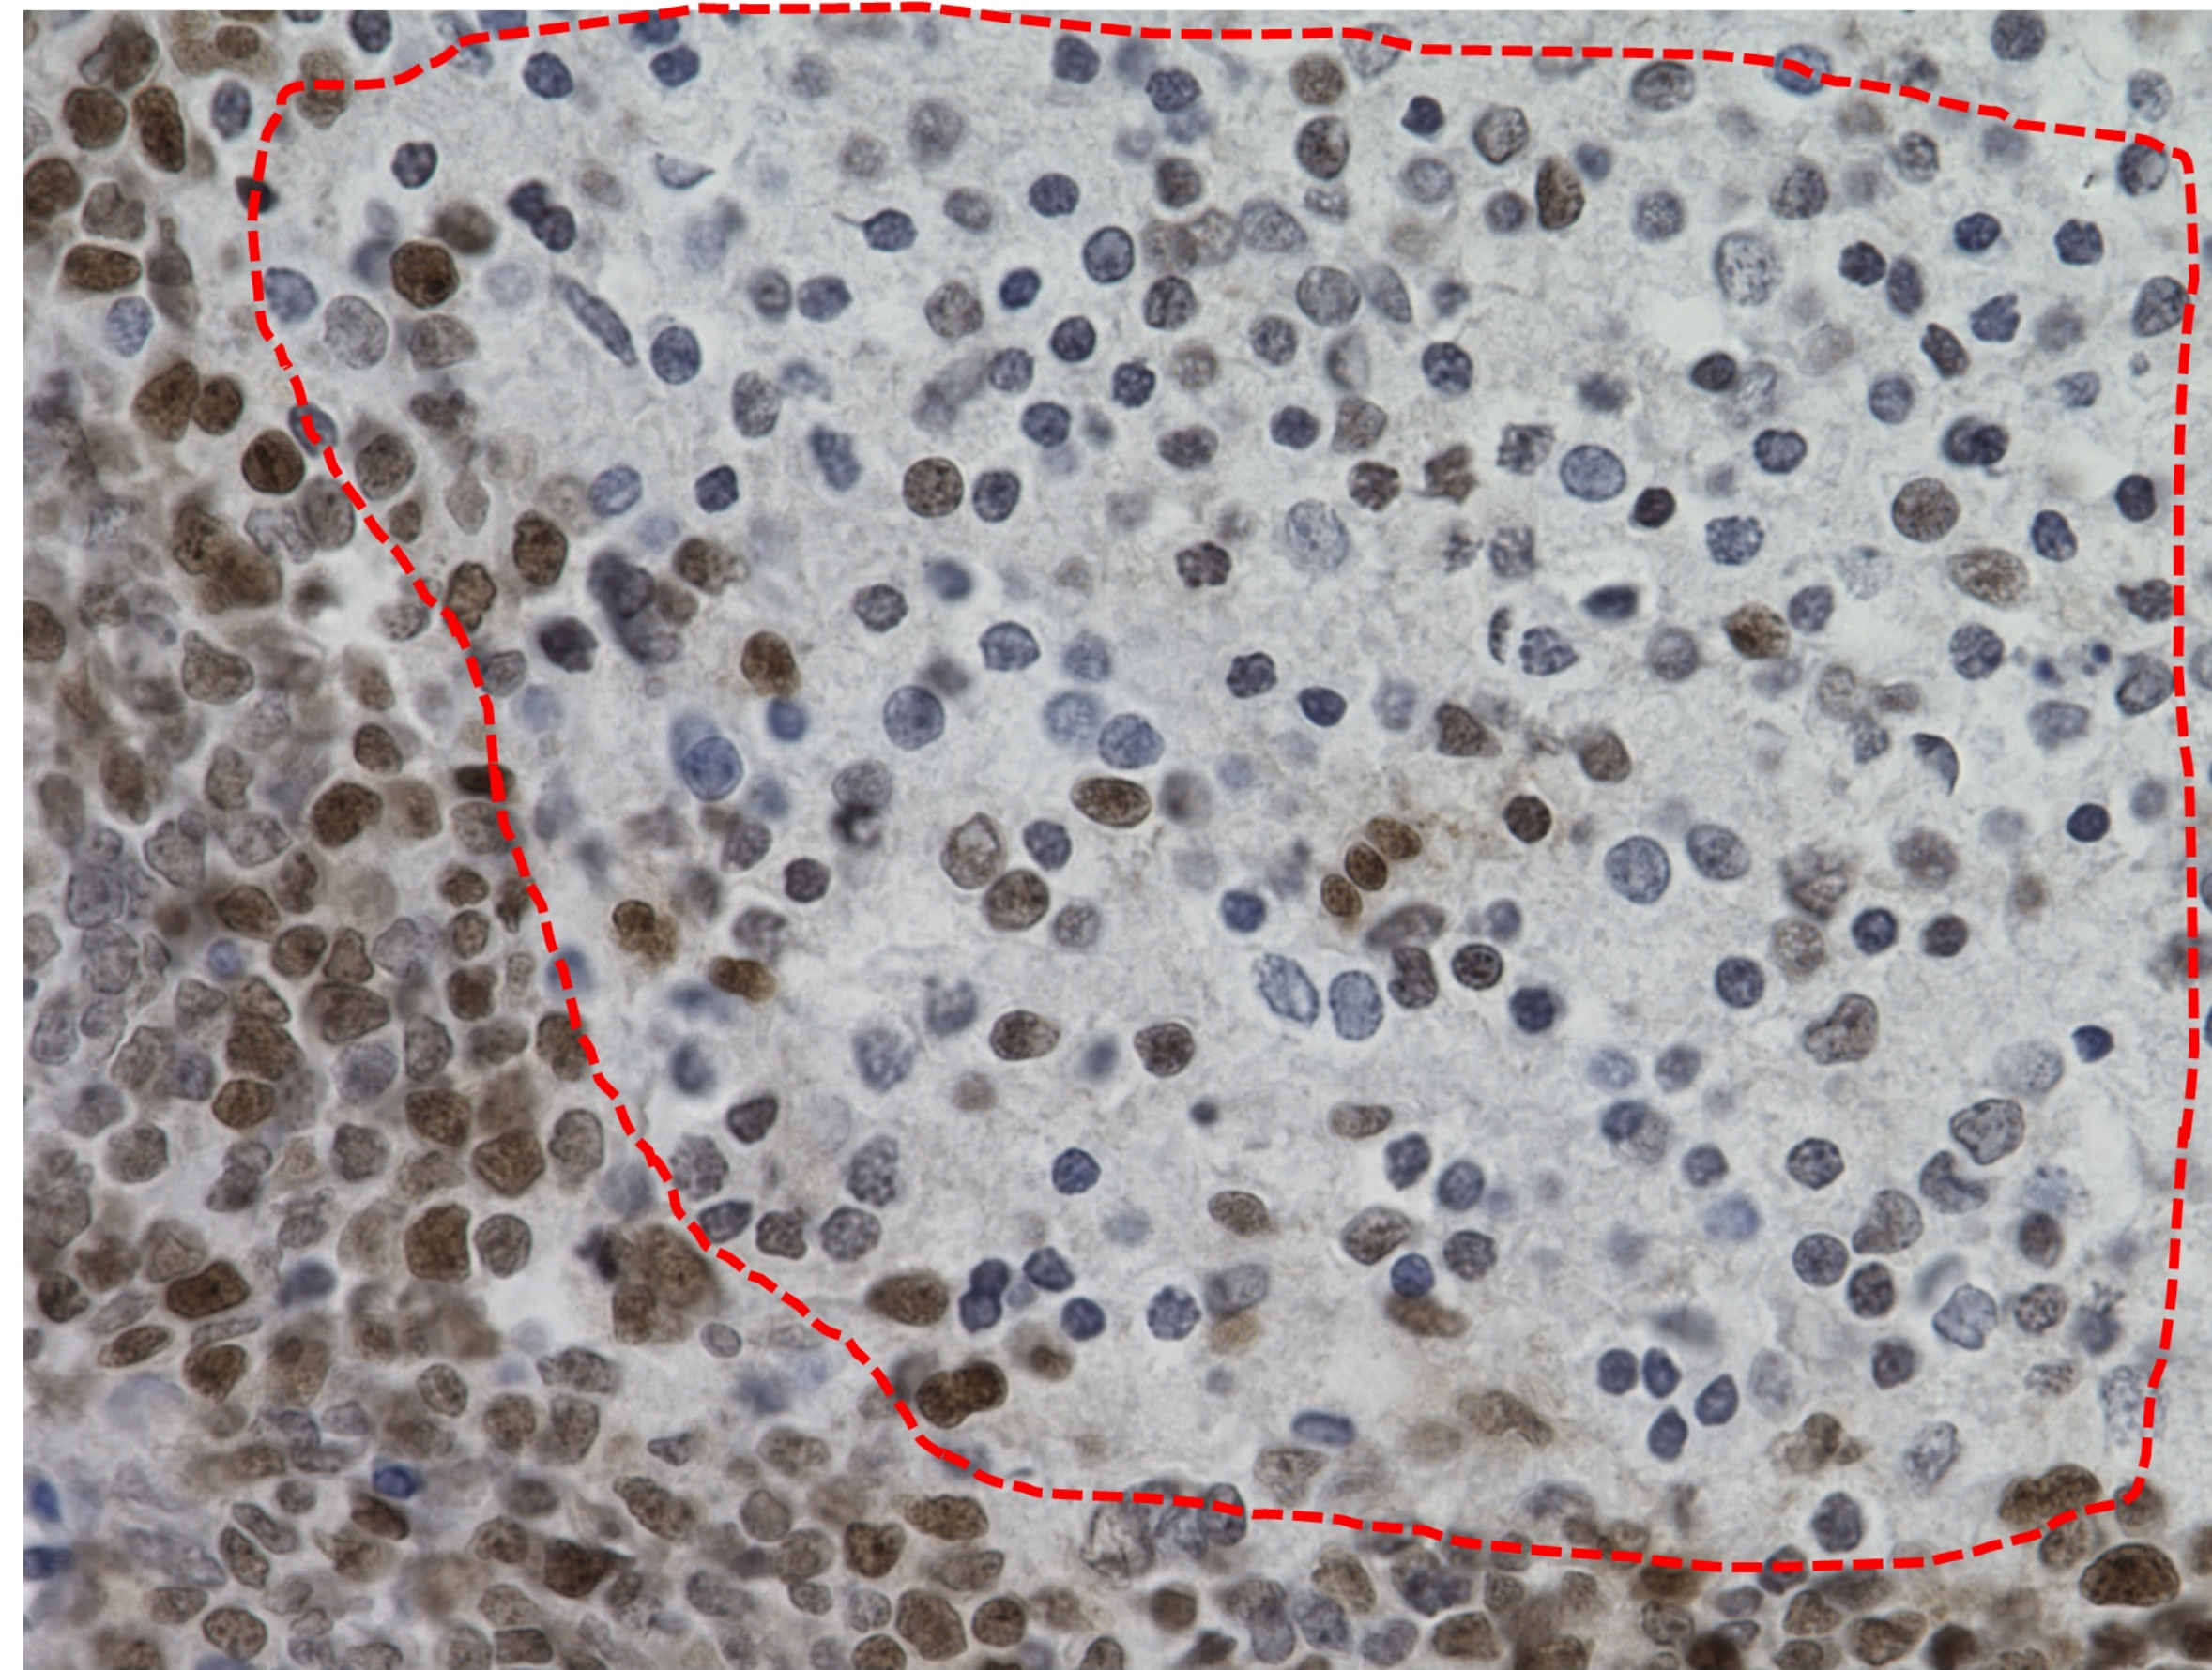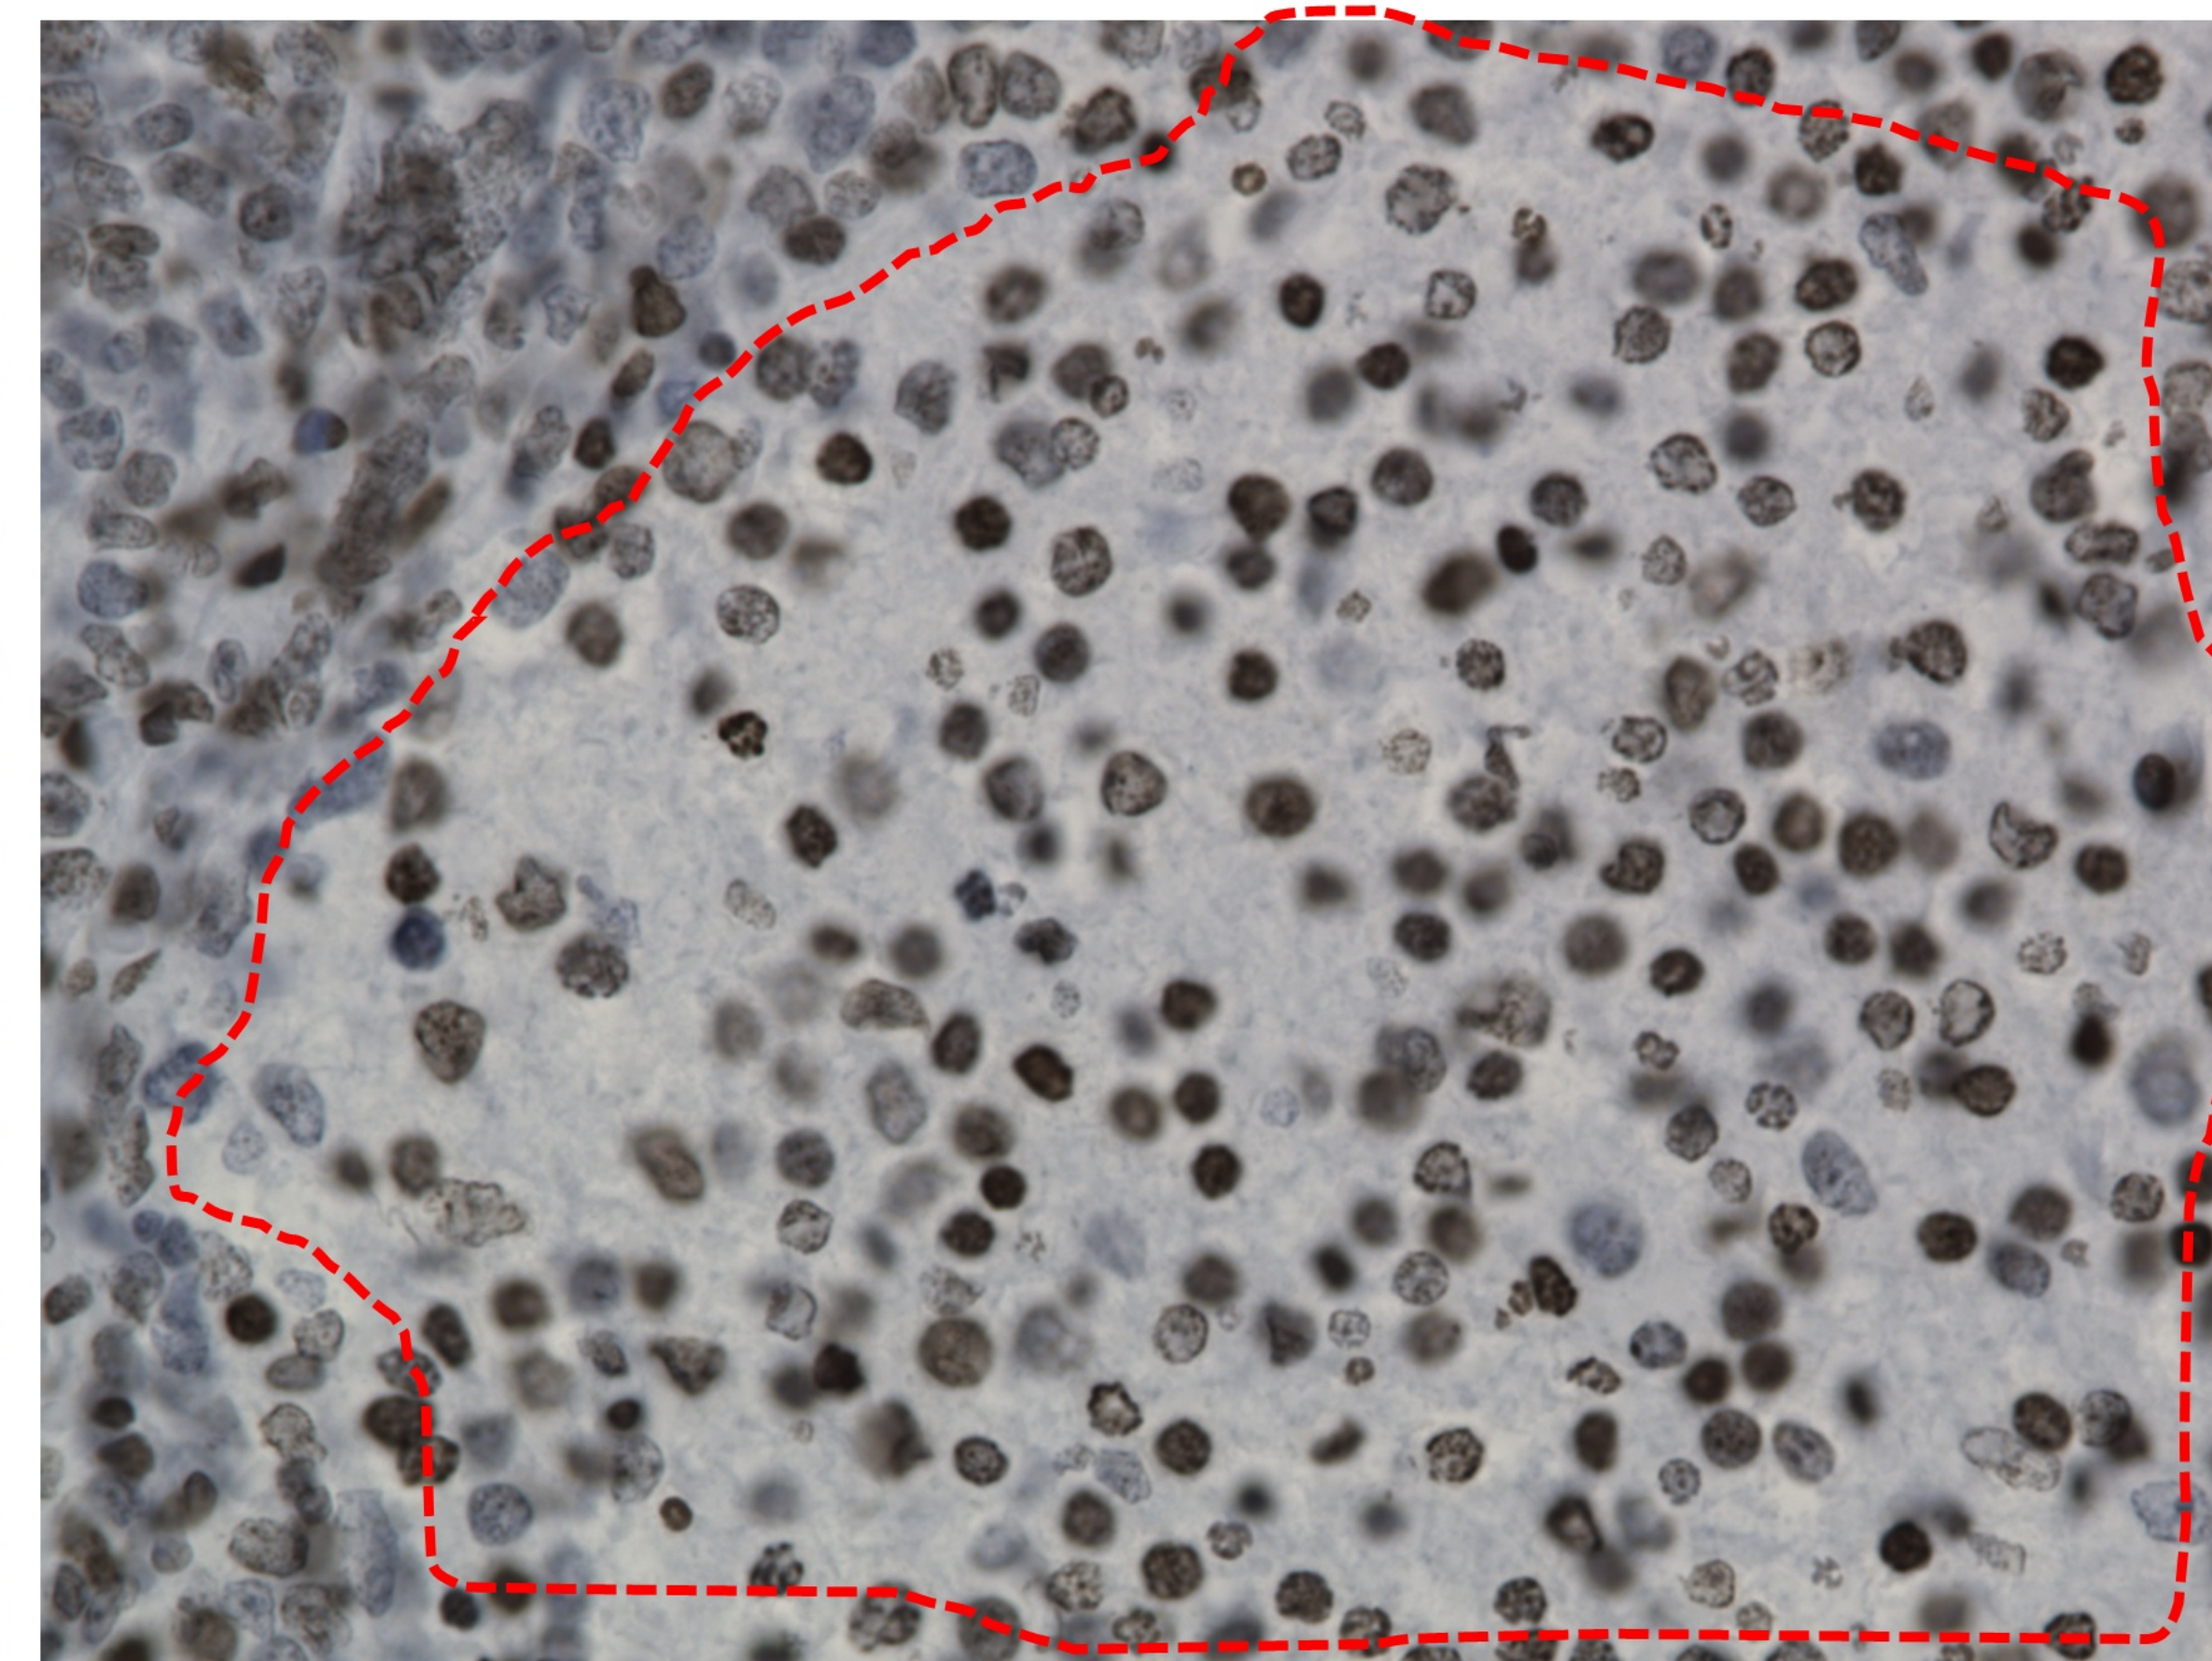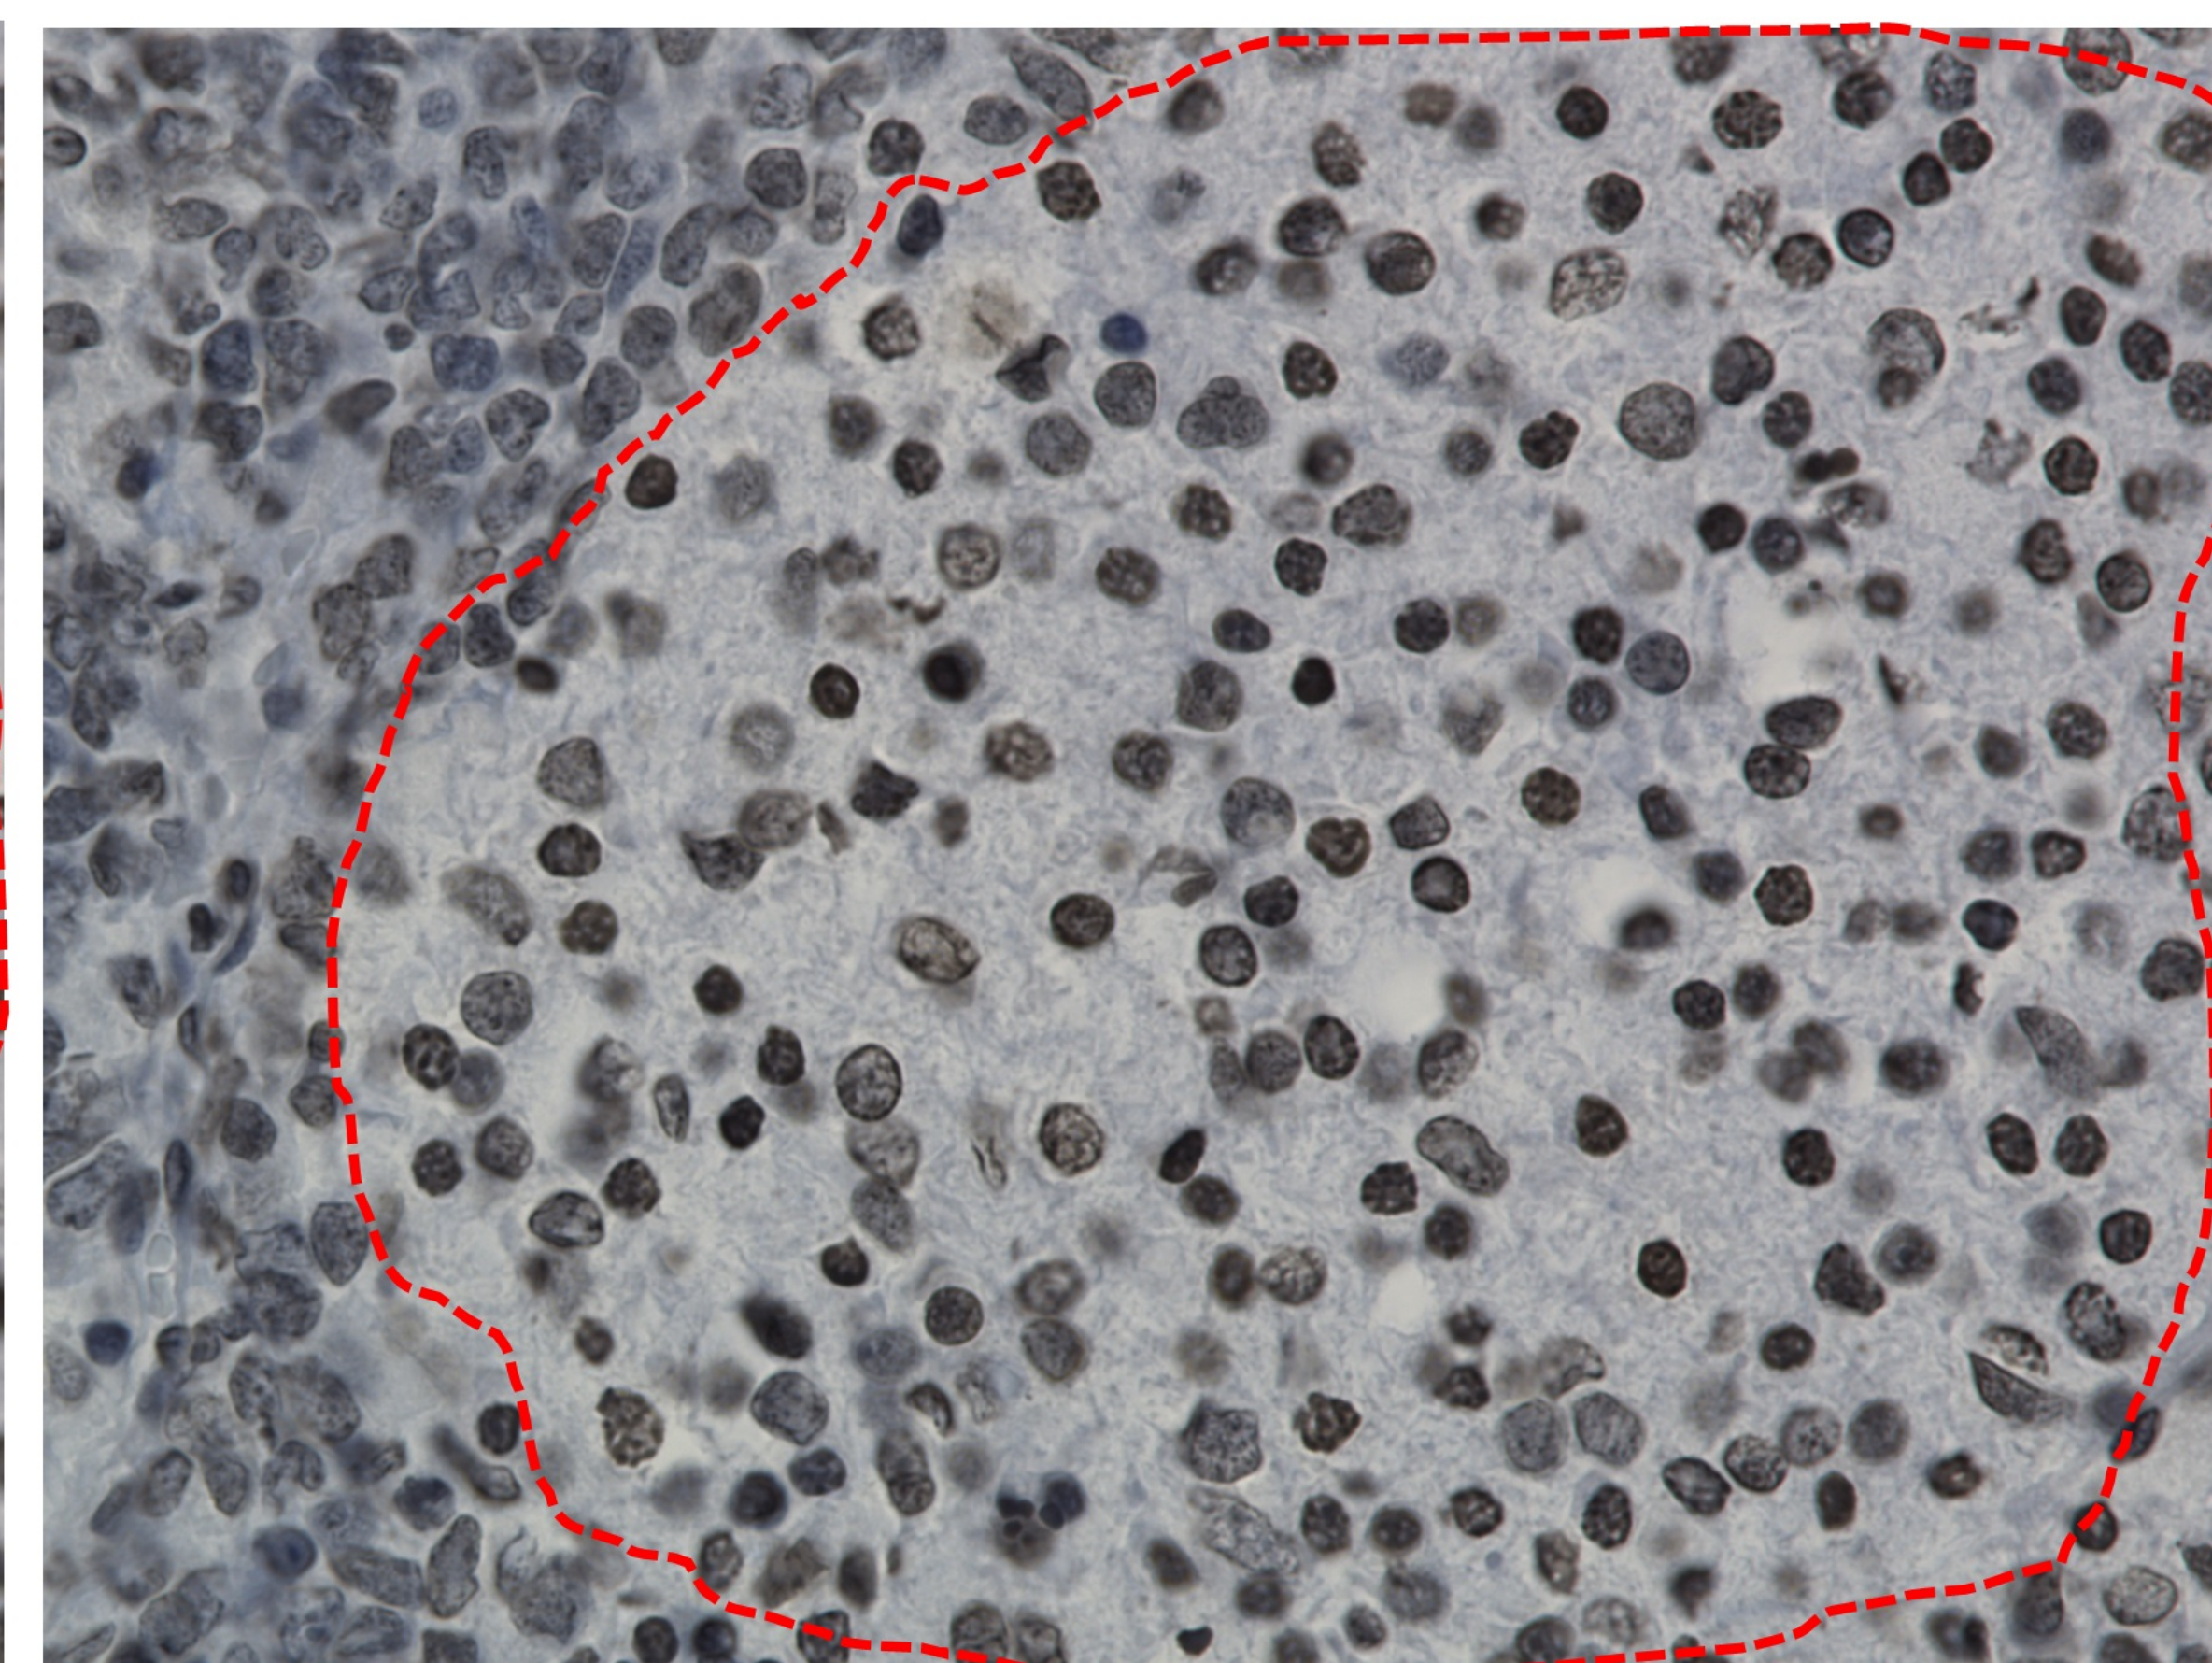

Supplement: NIHMS1899412-supplement-supplemental_table1_and_supplemental_figure1.pdf [file NIHMS1899412-supplement-supplemental_table1_and_supplemental_figure1.pdf]
